# Supplementary material for: Platelet Bone Morphogenetic Protein-4 Mediates Vascular Inflammation and Neointima Formation after Arterial Injury
Source: MDPI journal article supplement (doi:10.3390/cells10082027), 2021-08-08
Supplement: s1 [file s1]

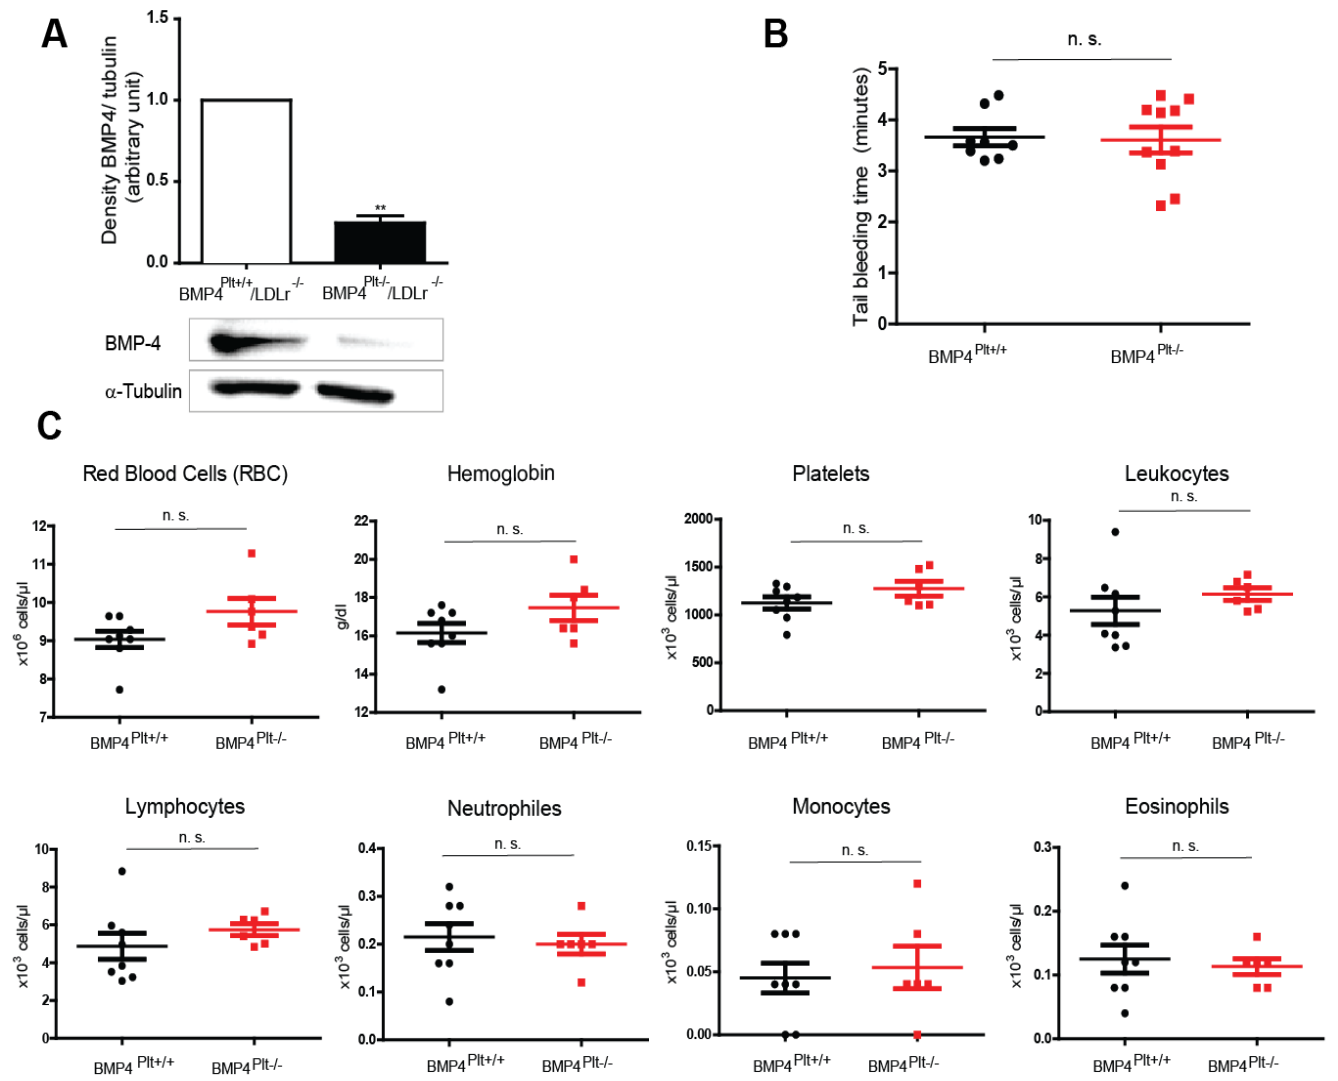

**Figure S1.** Basic characterization of BMP<sup>Plt-/-</sup> mice. **(A)** Protein expression of BMP-4 in platelets from BMP<sup>Plt+/+</sup>/LDLr<sup>-/-</sup> mice. **(B)** Bleeding times of control (BMP<sup>Plt+/+</sup>) and BMP<sup>Plt-/-</sup> mice. **(C)** Peripheral blood count between BMP<sup>Plt+/+</sup> (control) and BMP<sup>Plt-/-</sup> mice.  $n = 3$  independent experiments for **(B)**. \*\*  $p \leq 0.01$ ; n.s., not significant.
